# Supplementary material for: Structural changes in liquid crystal polymer vesicles induced by temperature variation and magnetic fields
Source: Royal Society of Chemistry journal article supplement (doi:10.1039/c0sm00751j), 2011-01-01
Supplement: c0sm00751j.pdf [file c0sm00751j.pdf]

## Supporting Information

# Structural changes in liquid crystal polymer vesicles induced by temperature variation and magnetic fields

Sabrina Hocine,<sup>1,2,3</sup> Annie Brûlet,<sup>4</sup> Lin Jia,<sup>1,2,3</sup> Jing Yang,<sup>1,2,3</sup> # Aurélie Di Cicco<sup>1,2,3</sup>,

Laurent Bouteiller<sup>3,5</sup> and Min-Hui Li<sup>1,2,3</sup> \*

<sup>1</sup> Institut Curie, Centre de Recherche, Paris, F-75248 France;

<sup>2</sup> CNRS, UMR168, Physico-Chimie Curie, Paris, F-75248 France ;

<sup>3</sup> UPMC Université Paris VI, Paris, F-75005 France ;

<sup>4</sup> Laboratoire Léon Brillouin, UMR12 CEA-CNRS, CEA Saclay, Gif sur Yvette, F-91191  
France ;

<sup>5</sup> CNRS, UMR 7610, Chimie des Polymères, F-75005 Paris, France.

*\*Corresponding author:* Tel.: 33-1-56246763; Fax: 33-1-40510636; email: min-hui.li@curie.fr

*# Present address:*

College of Life Science and Technology, Beijing University of Chemical and Technology,  
Beijing 100029, China.

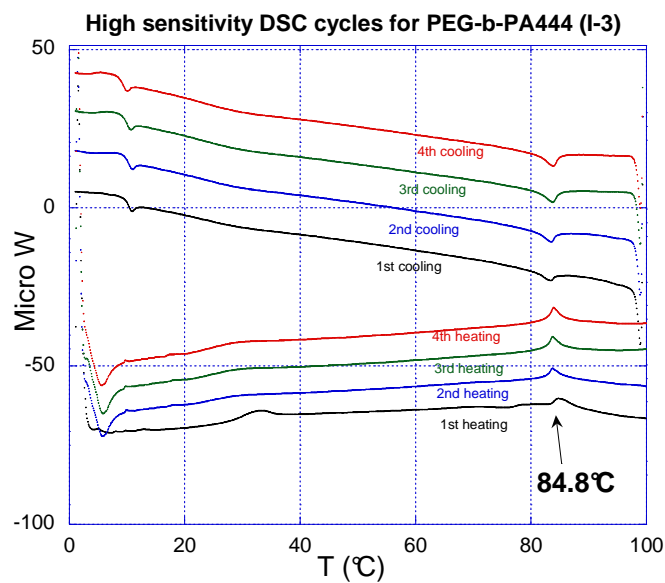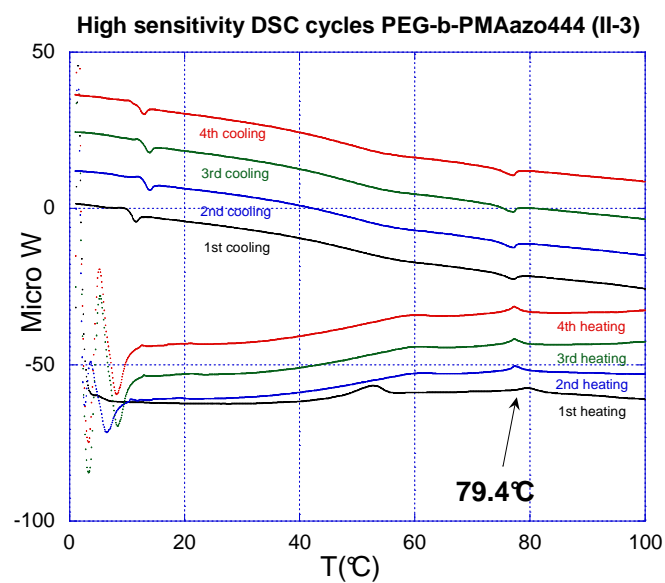

Figure SI-1 : Raw high sensitivity DSC thermograms of the polymersomes solutions formed with PEG-*b*-PA444 (I-3) and PEG-*b*-PMAazo444 (II-3) copolymers. The four heating and cooling traces have been shifted for clarity.

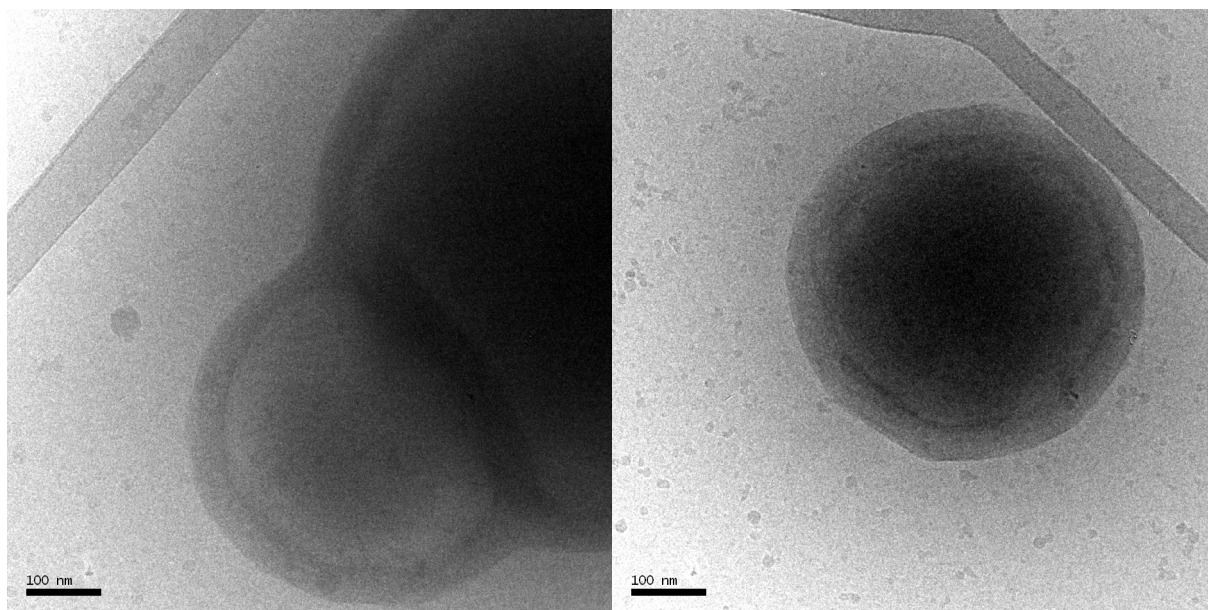

Figure SI-2. Cryo-TEM images of PEG-*b*-PMAazo444 (II-3) copolymer vesicles heated to 55-60°C during around ten hours. Scale: 100 nm. Thickness of membrane is 40-50 nm.

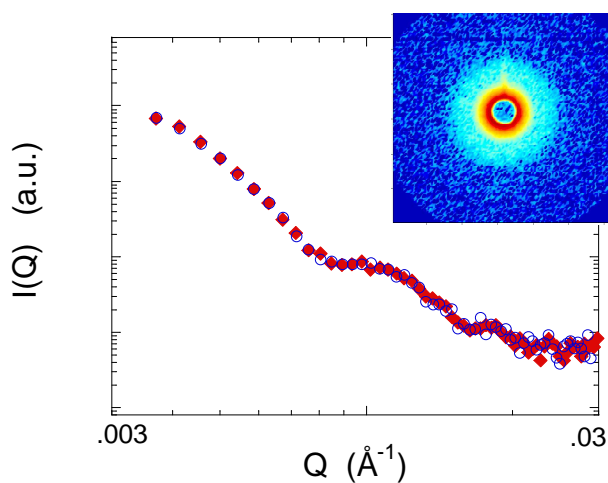

Figure SI-3. SANS  $I(q)$  curves parallel and perpendicular to the applied field of 1.4T for sample II-3 at 68°C. In the inset, the scattering pattern observed at low  $Q$  range showing no anisotropy.
